# Supplementary material for: Leveraging synthetic biology for producing bioactive polyketides and non-ribosomal peptides in bacterial heterologous hosts
Source: Royal Society of Chemistry journal article supplement (doi:10.1039/c9md00055k), 2019-01-01
Supplement: c9md00055k1.xlsx [file c9md00055k1.xlsx]

## Sheet: Sheet1
Author(s)	Title	Journal	Year
Li, Ruijuan; Li, Aiying; Shen, Yue-mao; Li, Yue-zhong	Enhanced heterologous spinosad production from a 79-kb synthetic multi-operon assembly	ACS Synthetic Biology	2019
Agostino, Paul M. D.; Gulder, Tobias A. M.	Direct Pathway Cloning Combined with Sequence- and Ligation-Independent Cloning for Fast Biosynthetic Gene Cluster Refactoring and Heterologous Expression	ACS Synthetic Biology	2018
Awakawa, Takayoshi; Fujioka, Takuma; Zhang, Lihan; Hoshino, Shotaro; Hu, Zhijuan; Hashimoto, Junko; Kozone, Ikuko; Ikeda, Haruo; Shin-Ya, Kazuo; Liu, Wen; Abe, Ikuro	Reprogramming of the antimycin NRPS-PKS assembly lines inspired by gene evolution	Nature Communications	2018
Becerril, Adriana; Alvarez, Susana; Brana, Alfredo F.; Rico, Sergio; Diaz, Margarita; Santamaria, Ramon I.; Salas, Jose A.; Mendez, Carmen	Uncovering production of specialized metabolites by Streptomyces argillaceus: Activation of cryptic biosynthesis gene clusters using nutritional and genetic approaches	PLOS ONE	2018
Cao, Xue-Qiang; Wang, Jia-Yuan; Zhou, Lian; Chen, Bo; Jin, Yu; He, Ya-Wen	Biosynthesis of the yellow xanthomonadin pigments involves an ATP-dependent 3-hydroxybenzoic acid: acyl carrier protein ligase and an unusual type II polyketide synthase pathway	MOLECULAR MICROBIOLOGY	2018
Choi, Kyeong Rok	Markerless gene knockout and integration to express heterologous biosynthetic gene clusters in Pseudomonas putida	Metabolic Enginering	2018
Dunbar, Kyle L.; Buettner, Hannah; Molloy, Evelyn M.; Dell, Maria; Kumpfmueller, Jana; Hertweck, Christian	Genome Editing Reveals Novel Thiotemplated Assembly of Polythioamide Antibiotics in Anaerobic Bacteria	ANGEWANDTE CHEMIE-INTERNATIONAL EDITION	2018
Fang, Lei; Guell, Marc; Church, George M.; Pfeifer, Blaine A.	Heterologous erythromycin production across strain and plasmid construction	BIOTECHNOLOGY PROGRESS	2018
Fang, Lei; Zhang, Guojian; El-Halfawy, Omar; Simon, Max; Brown, Eric D.; Pfeifer, Blaine A.	Broadened glycosylation patterning of heterologously produced erythromycin	BIOTECHNOLOGY AND BIOENGINEERING	2018
Garcia-Salcedo, Raul; Alvarez-Alvarez, Ruben; Olano, Carlos; Canedo, Librada; Brana, Alfredo F.; Mendez, Carmen; de la Calle, Fernando; Salas, Jose A.	Characterization of the Jomthonic Acids Biosynthesis Pathway and Isolation of Novel Analogues in Streptomyces caniferus GUA-06-05-006A.	Marine drugs	2018
Greunke, Christian; Duell, Elke Regina; Agostino, Paul Michael D.; Gl{\{o}}ckle	Direct Pathway Cloning (DiPaC) to unlock natural product biosynthetic potential	Metabolic Engineering	2018
Guang Yang, Monica A. Cozad, Destin A. Holland, Yi Zhang, Hendrik Luesch, and Yousong Ding	Photosynthetic Production of Sunscreen Shinorine Using an Engineered Cyanobacterium	ACS Synthetic Biology	2018
Hashimoto, Takuya	Biosynthesis of Quinolidomicin, the Largest Known Macrolide of Terrestrial Origin: Identification and Heterologous Expression of a Biosynthetic Gene Cluster over 200 kb	Organic Letters	2018
Hou, Lukuan; Huang, Huiming; Li, Huayue; Wang, Shuyao; Ju, Jianhua; Li, Wenli	Overexpression of a type III PKS gene affording novel violapyrones with enhanced anti-influenza A virus activity	MICROBIAL CELL FACTORIES	2018
Hou, Lukuan; Wang, Shuyao; Huang, Huiming; Li, Huayue; Wang, Wei; Li, Wenli	Generation of methylated violapyrones with improved anti-influenza A virus activity by heterologous expression of a type III PKS gene in a marine Streptomyces strain	BIOORGANIC {\&} MEDICINAL CHEMISTRY LETTERS	2018
Huang, Chunshuai; Yang, Chunfang; Zhu, Yiguang; Zhang, Wenjun; Yuan, Chengshan; Zhang, Changsheng	Marine Bacterial Aromatic Polyketides From Host-Dependent Heterologous Expression and Fungal Mode of Cyclization.	Frontiers in chemistry	2018
Huang, Fan; Tang, Jianli; He, Lian; Ding, Xuezhi; Huang, Shaoya; Zhang, Youming; Sun, Yunjun; Xia, Liqiu	Heterologous expression and antitumor activity analysis of syringolin from Pseudomonas syringae pv. syringae B728a.	Microbial cell factories	2018
Hug, Joachim J.; Panter, Fabian; Krug, Daniel; Muller, Rolf	Genome mining reveals uncommon alkylpyrones as type III PKS products from myxobacteria.	Journal of industrial microbiology {\&} biotechnology	2018
Kepplinger, Bernhard; Morton, S.; Seistrup, Kenneth Holst; Marrs, Emma Claire Louise; Hopkins, Adam Paul; Perry, John David; Strahl, Henrik; Morton-Laing, Stephanie; Seistrup, Kenneth Holst; Marrs, Emma Claire Louise; Hopkins, Adam Paul; Perry, John David; Strahl, Henrik; Hall, Michael John; Errington, Jeff; Allenby, Nicholas Edward Ellis	Mode of Action and Heterologous Expression of the Natural Product Antibiotic Vancoresmycin	ACS CHEMICAL BIOLOGY	2018
Klapper, Martin; Braga, Daniel; Lackner, Gerald; Herbst, Rosa; Stallforth, Pierre	Bacterial Alkaloid Biosynthesis: Structural Diversity via a Minimalistic Nonribosomal Peptide Synthetase	CELL CHEMICAL BIOLOGY	2018
Liu, Chenlang; Yu, Fangnan; Liu, Qingshu; Bian, Xiaoying; Hu, Shengbiao; Yang, Huansheng; Yin, Yulong; Li, Yuezhong; Shen, Yuemao; Xia, Liqiu; Tu, Qiang; Zhang, Youming	Yield improvement of epothilones in Burkholderia strain DSM7029 via transporter engineering	FEMS MICROBIOLOGY LETTERS	2018
Liu, Tianzhe; Mazmouz, Rabia; Neilan, Brett A.	An In Vitro and In Vivo Study of Broad-Range Phosphopantetheinyl Transferases for Heterologous Expression of Cyanobacterial Natural Products	ACS SYNTHETIC BIOLOGY	2018
Ng, Bee Gek; Han, Jae Woo; Lee, Dong Wan; Choi, Gyung Ja; Kim, Beom Seok	The chejuenolide biosynthetic gene cluster harboring an iterative trans-AT PKS system in Hahella chejuensis strain MB-1084	JOURNAL OF ANTIBIOTICS	2018
Novakova, Renata; Nunez, Luz Elena; Homerova, Dagmar; Knirschova, Renata; Feckova, Lubomira; Rezuchova, Bronislava; Sevcikova, Beatrica; Menendez, Nuria; Moris, Francisco; Cortes, Jesus; Kormanec, Jan	Increased heterologous production of the antitumoral polyketide mithramycin A by engineered Streptomyces lividans TK24 strains.	Applied microbiology and biotechnology	2018
Pait, Ivy Grace Umadhay; Kitani, Shigeru; Roslan, Farah Wahidah; Ulanova, Dana; Arai, Masayoshi; Ikeda, Haruo; Nihira, Takuya	Discovery of a new diol-containing polyketide by heterologous expression of a silent biosynthetic gene cluster from Streptomyces lavendulae FRI-5	JOURNAL OF INDUSTRIAL MICROBIOLOGY {\&} BIOTECHNOLOGY	2018
Panter, Fabian; Krug, Daniel; Baumann, Sascha; Mueller, Rolf	Self-resistance guided genome mining uncovers new topoisomerase inhibitors from myxobacteria	CHEMICAL SCIENCE	2018
Panter, Fabian; Krug, Daniel; Muller, Rolf	Novel methoxymethacrylate natural products uncovered by statistics-based mining of the Myxococcus fulvus secondary metabolome.	ACS chemical biology	2018
Parkinson, Elizabeth I.; Tryon, James H.; Goering, Anthony W.; Ju, Kou-San; Mcclure, Ryan A.; Kemball, Jeremy D.; Zhukovsky, Sara; Labeda, David P.; Thomson, Regan J.; Kelleher, Neil L.; Metcalf, William W.; Gene, Biosynthetic; Parkinson, Elizabeth I.; Tryon, James H.; Goering, Anthony W.; Ju, Kou-San; Mcclure, Ryan A.; Kemball, Jeremy D.; Zhukovsky, Sara; Labeda, David P.; Thomson, Regan J.; Kel…	Discovery of the Tyrobetaine Natural Products and Their Biosynthetic Gene Cluster via Metabologenomics	ACS CHEMICAL BIOLOGY	2018
Paulus, Constanze; Rebets, Yuriy; Zapp, Josef; Rueckert, Christian; Kalinowski, Joern; Luzhetskyy, Andriy	New Alpiniamides From Streptomyces sp IB2014/011-12 Assembled by an Unusual Hybrid Non-ribosomal Peptide Synthetase Trans-AT Polyketide Synthase Enzyme	FRONTIERS IN MICROBIOLOGY	2018
Peng, Qinying; Gao, Guixi; L{\{u}}	Engineered Streptomyces lividans Strains for Optimal Identification and Expression of Cryptic Biosynthetic Gene Clusters	Frontiers in Microbiology	2018
Peng, Ran; Wang, Ye; Feng, Wan; Yue, Xin; Chen, Jiang; Hu, Xiao; Li, Zhi	CRISPR/dCas9â€‘mediated transcriptional improvement of the biosynthetic gene cluster for the epothilone production in Myxococcus xanthus	Microbial Cell Factories	2018
Roulet, Julia; Taton, Arnaud; Golden, James W.; Arabolaza, Ana; Burkart, Michael D.; Gramajo, Hugo	Development of a cyanobacterial heterologous polyketide production platform	Metabolic Engineering	2018
Schwarzer, Philipp; Wunsch-Palasis, Julia; Bechthold, Andreas; Paululat, Thomas	Biosynthesis of Rishirilide B	ANTIBIOTICS-BASEL	2018
Skyrud, Will; Liu, Joyce; Thankachan, Divya; Cabrera, Maria; Seipke, Ryan F.; Zhang, Wenjun	Biosynthesis of the 15-Membered Ring Depsipeptide Neoantimycin	ACS CHEMICAL BIOLOGY	2018
Sone, Yusuke; Nakamura, Shuto; Sasaki, Makoto; Hasebe, Fumihito; Kim, Seung-Young; Funa, Nobutaka	Bacterial Enzymes Catalyzing the Synthesis of 1,8-Dihydroxynaphthalene, a Key Precursor of Dihydroxynaphthalene Melanin, from Sorangium cellulosum	APPLIED AND ENVIRONMENTAL MICROBIOLOGY	2018
Sun, Fengxian; Xu, Shumei; Jiang, Fang; Liu, Weiying	Genomic-driven discovery of an amidinohydrolase involved in the biosynthesis of mediomycin A	APPLIED MICROBIOLOGY AND BIOTECHNOLOGY	2018
Thongkongkaew, Tawatchai; Ding, Wei; Bratovanov, Evgeni; Oueis, Emilia; Garci A-Altares, Mari A.; Zaburannyi, Nestor; Harmrolfs, Kirsten; Zhang, Youming; Scherlach, Kirstin; Muller, Rolf; Hertweck, Christian	Two Types of Threonine-Tagged Lipopeptides Synergize in Host Colonization by Pathogenic Burkholderia Species.	ACS chemical biology	2018
Tianzhe Liu†, Rabia Mazmouz†‡ , and Brett A. Neilan*†‡	An In Vitro and In Vivo Study of Broad-Range Phosphopantetheinyl Transferases for Heterologous Expression of Cyanobacterial Natural Products	ACS Synthetic Biology	2018
Tu, Jiajia; Li, Siting; Chen, Jiang; Song, Yongxiang; Fu, Shaobin; Ju, Jianhua; Li, Qinglian	Characterization and heterologous expression of the neoabyssomicin/abyssomicin biosynthetic gene cluster from Streptomyces koyangensis SCSIO 5802	MICROBIAL CELL FACTORIES	2018
Wells, Kaitlyn N.; Videau, Patrick; Nelson, Dylan; Eiting, Jessie E.; Philmus, Benjamin	The influence of sigma factors and ribosomal recognition elements on heterologous expression of cyanobacterial gene clusters in Escherichia coli	FEMS Microbiology Letters	2018
Winn, Michael; Francis, Daniel; Micklefield, Jason	De novo Biosynthesis of ``Non-Natural\''\ Thaxtomin Phytotoxins	ANGEWANDTE CHEMIE-INTERNATIONAL EDITION	2018
Wolf, Felix; Leipoldt, Franziska; Kulik, Andreas; Wibberg, Daniel; Kalinowski, Joern; Kaysser, Leonard	Characterization of the Actinonin Biosynthetic Gene Cluster	CHEMBIOCHEM	2018
Wolff, Hendrik; Bode, Helge B.	The benzodiazepine-like natural product tilivalline is produced by the entomopathogenic bacterium Xenorhabdus eapokensis	PLOS ONE	2018
Yan, Fu; Auerbach, David; Chai, Yi; Keller, Lena; Tu, Qiang; H{\{u}}ttel	Biosynthesis and Heterologous Production of Vioprolides: Rational Biosynthetic Engineering and Unprecedented 4-Methylazetidinecarboxylic Acid Formation	Angewandte Chemie - International Edition	2018
Yan, Fu; Burgard, Christian; Popoff, Alexander; Zaburannyi, Nestor; Zipf, Gregor; Maier, Josef; Bernauer, Hubert S.; Wenzel, Silke C.; Mueller, Rolf	Synthetic biology approaches and combinatorial biosynthesis towards heterologous lipopeptide production	CHEMICAL SCIENCE	2018
Yang, Dongsoo; Kim, Won Jun; Yoo, Seung Min; Choi, Jong Hyun; Ha, Shin Hee; Lee, Mun Hee; Lee, Sang Yup	Repurposing type III polyketide synthase as a malonyl-CoA biosensor for metabolic engineering in bacteria	Pnas	2018
Yue, Xin-jing; Cui, Xiao-wen; Zhang, Zheng; Hu, Wei-feng; Li, Zhi-feng; Zhang, You-ming; Li, Yue-zhong	Effects of transcriptional mode on promoter substitution and tandem engineering for the production of epothilones in Myxococcus xanthus	Applied Microbiology and Biotechnology	2018
Zhang, Chunyan; Sun, Changli; Huang, Hongbo; Gui, Chun; Wang, Liyan; Li, Qinglian; Ju, Jianhua	Biosynthetic Baeyerâ€“Villiger Chemistry Enables Access to Two Anthracene Scaffolds from a Single Gene Cluster in Deep-Sea-Derived Streptomyces olivaceus SCSIO T05	Journal of Natural Products	2018
Zhou, Yongjun; Lin, Xiao; Williams, Simon R.; Liu, Liyun; Shen, Yaoyao; Wang, Shu-Ping; Sun, Fan; Xu, Shihai; Deng, Hai; Leadlay, Peter F.; Lin, Hou-Wen	Directed Accumulation of Anticancer Depsipeptides by Characterization of Neoantimycins Biosynthetic Pathway and an NADPH-Dependent Reductase	ACS CHEMICAL BIOLOGY	2018
	Bacterial Alkaloid Biosynthesis: Structural Diversity via a Minimalistic Nonribosomal Peptide Synthetase	Cell Chemical Biology	2018
Bian, Xiaoying; Tang, Biao; Yu, Yucong; Tu, Qiang; Gross, Frank; Wang, Hailong; Li, Aiying; Shen, Yuemao; Li, Yue-zhong; Stewart, A. Francis; Zhao, Guoping; Ding, Xiaoming; Mueller, Rolf; Zhang, Youming	Heterologous Production and Yield Improvement of Epothilones in Burkholderiales Strain DSM 7029	ACS CHEMICAL BIOLOGY	2017
Bitok, J. Kipchirchir; Lemetre, Christophe; Ternei, Melinda A.; Brady, Sean F.	Identification of biosynthetic gene clusters from metagenomic libraries using PPTase complementation in a Streptomyces host	FEMS MICROBIOLOGY LETTERS	2017
Choi, Si-Sun; Nah, Hee-Ju; Pyeon, Hye-Rim; Kim, Eung-Soo	Biosynthesis, regulation, and engineering of a linear polyketide tautomycetin: a novel immunosuppressant in Streptomyces sp. CK4412.	Journal of industrial microbiology {\&} biotechnology	2017
Cleto, Sara; Lu, Timothy K.	An Engineered Synthetic Pathway for Discovering Nonnatural Nonribosomal Peptides in Escherichia coli.	mBio	2017
Deng, Qian; Zhou, Li; Luo, Meizhong; Deng, Zixin; Zhao, Changming	Heterologous expression of Avermectins biosynthetic gene cluster by construction of a Bacterial Artificial Chromosome library of the producers	SYNTHETIC AND SYSTEMS BIOTECHNOLOGY	2017
Domr{\{o}}se	Andreas; Weihmann	Rapid generation of recombinant Pseudomonas putida secondary metabolite producers using yTREX	2017
Gemperlein, Katja; Hoffmann, Michael; Huo, Liujie; Pilak, Patrick; Petzke, Lutz; M{\{u}}ller	Synthetic biology approaches to establish a heterologous production system for coronatines	Metabolic Engineering	2017
Guo, Chun-Jun; Chang, Fang-Yuan; Wyche, Thomas P.; Backus, Keriann M.; Acker, Timothy M.; Funabashi, Masanori; Taketani, Mao; Donia, Mohamed S.; Nayfach, Stephen; Pollard, Katherine S.; Craik, Charles S.; Cravatt, Benjamin F.; Clardy, Jon; Voigt, Christopher A.; Fischbach, Michael A.	Discovery of Reactive Microbiota-Derived Metabolites that Inhibit Host Proteases	CELL	2017
Inahashi, Yuki; Zhou, Shanshan; Bibb, Maureen J.; Song, Lijiang; Al-Bassam, Mahmoud M.; Bibb, Mervyn J.; Challis, Gregory L.	Watasemycin biosynthesis in Streptomyces venezuelae: thiazoline C-methylation by a type B radical-SAM methylase homologue	CHEMICAL SCIENCE	2017
Klein, Andreas S.	New Prodigiosin Derivatives Obtained by Mutasynthesis in Pseudomonas putida	ACS Synthetic Biology	2017
Larson, Charles B.; Crusemann, Max; Moore, Bradley S.	PCR-Independent Method of Transformation-Associated Recombination Reveals the Cosmomycin Biosynthetic Gene Cluster in an Ocean Streptomycete	JOURNAL OF NATURAL PRODUCTS	2017
Leipoldt, Franziska; Santos-Aberturas, Javier; Stegmann, Dennis P.; Wolf, Felix; Kulik, Andreas; Lacret, Rodney; Popadic, Desiree; Keinhoerster, Daniela; Kirchner, Norbert; Bekiesch, Paulina; Gross, Harald; Truman, Andrew W.; Kaysser, Leonard	Warhead biosynthesis and the origin of structural diversity in hydroxamate metalloproteinase inhibitors	NATURE COMMUNICATIONS	2017
Liu, Tianzhe; Mazmouz, Rabia; Ongley, Sarah E.; Chau, Rocky; Pickford, Russell; Woodhouse, Jason N.; Neilan, Brett A.	Directing the Heterologous Production of Speci fi c Cyanobacterial Toxin Variants	ACS Chemical Biology	2017
Losada, Armando A.; Mendez, Carmen; Salas, Jose A.; Olano, Carlos	Exploring the biocombinatorial potential of benzoxazoles: generation of novel caboxamycin derivatives	MICROBIAL CELL FACTORIES	2017
Moscatello, Nicholas; Qi, Ruiquan; Ahmadi, Mahmoud Kamal; Pfeifer, Blaine A.	Increased Production of Yersiniabactin and an Anthranilate Analog Through Media Optimization	BIOTECHNOLOGY PROGRESS	2017
Pait, Ivy Grace Umadhay; Kitani, Shigeru; Kurniawan, Yohanes Novi; Asa, Maeda; Iwai, Takashi; Ikeda, Haruo; Nihira, Takuya	Identification and characterization of lbpA, an indigoidine biosynthetic gene in the gammabutyrolactone signaling system of Streptomyces lavendulae FRI-5	JOURNAL OF BIOSCIENCE AND BIOENGINEERING	2017
Pyeon, Hye-rim; Nah, Hee-Ju; Kang, Seung-Hoon; Choi, Si-Sun; Kim, Eung-Soo	Heterologous expression of pikromycin biosynthetic gene cluster using Streptomyces artificial chromosome system	MICROBIAL CELL FACTORIES	2017
Saha, Subhasish; Zhang, Wenjun; Zhang, Guangtao; Zhu, Yiguang; Chen, Yuchan; Liu, Wei; Yuan, Chengshan; Zhang, Qingbo; Zhang, Haibo; Zhang, Liping; Zhang, Weimin; Zhang, Changsheng	Activation and characterization of a cryptic gene cluster reveals a cyclization cascade for polycyclic tetramate macrolactams	CHEMICAL SCIENCE	2017
Saugar, Irene; Molloy, Brian; Sanz, Eloisa; Blanca Sanchez, Maria; Fernandez-Lobato, Maria; Jimenez, Antonio; Sanchez, Maria Blanca; Fernandez-Lobato, Maria; Jimenez, Antonio	Characterization of the biosynthetic gene cluster (ata) for the A201A arninonucleoside antibiotic from Saccharothrix mutabilis subsp capreolus	JOURNAL OF ANTIBIOTICS	2017
Sucipto, Hilda; Pogorevc, Domen; Luxenburger, Eva; Wenzel, Silke C.; M{\{u}}ller	Heterologous production of myxobacterial $\alpha$-pyrone antibiotics in \textlessi\textgreaterMyxococcus xanthus\textless/i\textgreater	Metabolic Engineering	2017
Takeda, Kunpei; Kemmoku, Kohei; Satoh, Yasuharu; Ogasawara, Yasushi; Shin-ya, Kazuo; Dairi, Tohru	N-Phenylacetylation and Nonribosomal Peptide Synthetases with Substrate Promiscuity for Biosynthesis of Heptapeptide Variants, JBIR-78 and JBIR-95	ACS CHEMICAL BIOLOGY	2017
Tan, Gao-Yi; Deng, Kunhua; Liu, Xinhua; Tao, Hui; Chang, Yingying; Chen, Jia; Chen, Kai; Sheng, Zhi; Deng, Zixin; Liu, Tiangang	Heterologous Biosynthesis of Spinosad: An Omics-Guided Large, Polyketide Synthase Gene Cluster Reconstitution in Streptomyces	ACS SYNTHETIC BIOLOGY	2017
Tianzhe Liu,† Rabia Mazmouz,†,‡ Sarah E. Ongley,†,‡ Rocky Chau,† Russell Pickford,§ Jason N. Woodhouse,†,∥ and Brett A. Neilan	Directing the Heterologous Production of Specific Cyanobacterial Toxin Variants	ACS Chemical Biology	2017
Vandova, Gergana A.; O'Brien, Robert V.; Lowry, Brian; Robbins, Thomas F.; Fischer, Curt R.; Davis, Ronald W.; Khoslas, Chaitan; Harvey, Colin J. B.; Hillenmeyer, Maureen E.	Heterologous expression of diverse propionyl-CoA carboxylases affects polyketide production in Escherichia coli	JOURNAL OF ANTIBIOTICS	2017
Yurkovich, Marie E.; Jenkins, Robert; Sun, Yuhui; Tosin, Manuela; Leadlay, Peter F.	The polyketide backbone of thiolactomycin is assembled by an unusual iterative polyketide synthase	CHEMICAL COMMUNICATIONS	2017
Yuzawa, Satoshi; Bailey, Constance B.; Fujii, Tatsuya; Jocic, Renee; Barajas, Jesus F.; Benites, Veronica T.; Baidoo, Edward E.K.; Chen, Yan; Petzold, Christopher J.; Katz, Leonard; Keasling, Jay D.	Heterologous Gene Expression of N-Terminally Truncated Variants of LipPks1 Suggests a Functionally Critical Structural Motif in the N-terminus of Modular Polyketide Synthase	ACS Chemical Biology	2017
Zhang, Bo	Discovery, Biosynthesis, and Heterologous Production of Streptoseomycin, an Anti-Microaerophilic Bacteria Macrodilactone	Organic Letters	2017
Zhang, Lihan; Hashimoto, Takuya; Qin, Bin; Hashimoto, Junko; Kozone, Ikuko; Kawahara, Teppei; Okada, Masahiro; Awakawa, Takayoshi; Ito, Takuya; Asakawa, Yoshinori; Ueki, Masashi; Takahashi, Shunji; Osada, Hiroyuki; Wakimoto, Toshiyuki; Ikeda, Haruo; Shin-ya, Kazuo; Abe, Ikuro	Characterization of Giant Modular PKSs Provides Insight into Genetic Mechanism for Structural Diversification of Aminopolyol Polyketides	ANGEWANDTE CHEMIE-INTERNATIONAL EDITION	2017
Zhang, Xiaojie; Lu, Chenyang; Bai, Linquan	Conversion of the high-yield salinomycin producer Streptomyces albus BK3-25 into a surrogate host for polyketide production	SCIENCE CHINA-LIFE SCIENCES	2017
Ahmadi, Mahmoud Kamal; Fawaz, Samar; Fang, Lei; Yu, Zhipeng; Pfeifer, Blaine A.	Molecular variation of the nonribosomal peptide-polyketide siderophore yersiniabactin through biosynthetic and metabolic engineering	BIOTECHNOLOGY AND BIOENGINEERING	2016
Ahmadi, Mahmoud Kamal; Pfeifer, Blaine A.	Improved Heterologous Production of the Nonribosomal Peptide-Polyketide Siderophore Yersiniabactin Through Metabolic Engineering and Induction Optimization	BIOTECHNOLOGY PROGRESS	2016
Chiu, Hsien-Tai; Weng, Chien-Pao; Lin, Yu-Chin; Chen, Kuan-Hung	Target-specific identification and characterization of the putative gene cluster for brasilinolide biosynthesis revealing the mechanistic insights and connic enzymes	ORGANIC {\&} BIOMOLECULAR CHEMISTRY	2016
Gemperlein, Katja; Zipf, Gregor; Bernauer, Hubert S.; Mueller, Rolf; Wenzel, Silke C.	Metabolic engineering of Pseudomonas putida for production of docosahexaenoic acid based on a myxobacterial PUFA synthase	METABOLIC ENGINEERING	2016
Hong, Hui; Sun, Yuhui; Zhou, Yongjun; Stephens, Emily; Samborskyy, Markiyan; Leadlay, Peter F.	Evidence for an iterative module in chain elongation on the azalomycin polyketide synthase	BEILSTEIN JOURNAL OF ORGANIC CHEMISTRY	2016
Huang, Jun; Yu, Zhen; Li, Mei-Hong; Wang, Ji-Dong; Bai, Hua; Zhou, Jun; Zheng, Yu-Guo	High Level of Spinosad Production in the Heterologous Host Saccharopolyspora erythraea	APPLIED AND ENVIRONMENTAL MICROBIOLOGY	2016
Iqbal, Hala A.; Low-Beinart, Lila; Obiajulu, Joseph U.; Brady, Sean F.	Natural Product Discovery through Improved Functional Metagenomics in Streptomyces	JOURNAL OF THE AMERICAN CHEMICAL SOCIETY	2016
Kumpfmueller, Jana; Methling, Karen; Fang, Lei; Pfeifer, Blaine A.; Lalk, Michael; Schweder, Thomas; Kumpfm{\{u}}ller	Production of the polyketide 6-deoxyerythronolide B in the heterologous host Bacillus subtilis	APPLIED MICROBIOLOGY AND BIOTECHNOLOGY	2016
Liu, Qingshu; Shen, Qiyao; Bian, Xiaoying; Chen, Hanna; Fu, Jun; Wang, Hailong	Simple and rapid direct cloning and heterologous expression of natural product biosynthetic gene cluster in Bacillus subtilis via Red / ET recombineering	Nature Publishing Group	2016
Maxson, Tucker; Tietz, Jonathan I.; Hudson, Graham A.; Guo, Xiao Rui; Tai, Hua-Chia; Mitchell, Douglas A.	Targeting Reactive Carbonyls for Identifying Natural Products and Their Biosynthetic Origins	JOURNAL OF THE AMERICAN CHEMICAL SOCIETY	2016
McClure, Ryan A.; Goering, Anthony W.; Ju, Kou-San; Baccile, Joshua A.; Schroeder, Frank C.; Metcalf, William W.; Thomson, Regan J.; Kelleher, Neil. L.	Elucidating the Rimosamide-Detoxin Natural Product Families and Their Biosynthesis Using Metabolite/Gene Cluster Correlations	ACS CHEMICAL BIOLOGY	2016
Meng, Hai-Lin; Xiong, Zhi-Qiang; Song, Shu-Jie; Wang, Jianfeng; Wang, Yong	Construction of polyketide overproducing Escherichia coli strains via synthetic antisense RNAs based on in silico fluxome analysis and comparative transcriptome analysis	BIOTECHNOLOGY JOURNAL	2016
Ray, Lauren; Yamanaka, Kazuya; Moore, Bradley S.	A Peptidyl-Transesterifying Type I Thioesterase in Salinamide Biosynthesis	ANGEWANDTE CHEMIE-INTERNATIONAL EDITION	2016
Sun, Yuwei; Feng, Zhiyang; Tomura, Tomohiko; Suzuki, Akira; Miyano, Seishi; Tsuge, Takashi; Mori, Hitoshi; Suh, Joo-Won; Iizuka, Takashi; Fudou, Ryosuke; Ojika, Makoto	Heterologous Production of the Marine Myxobacterial Antibiotic Haliangicin and Its Unnatural Analogues Generated by Engineering of the Biochemical Pathway	SCIENTIFIC REPORTS	2016
Tao, W.; Yurkovich, M. E.; Wen, S.; Lebe, K. E.; Samborskyy, M.; Liu, Y.; Yang, A.; Liu, Y.; Ju, Y.; Deng, Z.; Tosin, M.; Sun, Y.; Leadlay, P. F.	A genomics-led approach to deciphering the mechanism of thiotetronate antibiotic biosynthesis	CHEMICAL SCIENCE	2016
Thanapipatsiri, Anyarat; Gomez-Escribano, Juan Pablo; Song, Lijiang; Bibb, Maureen J.; Al-Bassam, Mahmoud; Chandra, Govind; Thamchaipenet, Arinthip; Challis, Gregory L.; Bibb, Mervyn J.	Discovery of Unusual Biaryl Polyketides by Activation of a Silent Streptomyces venezuelae Biosynthetic Gene Cluster	CHEMBIOCHEM	2016
Tu, Qiang; Herrmann, Jennifer; Hu, Shengbiao; Raju, Ritesh; Bian, Xiaoying; Zhang, Youming; Mueller, Rolf; M{\{u}}ller	Genetic engineering and heterologous expression of the disorazol biosynthetic gene cluster via Red/ET recombineering	SCIENTIFIC REPORTS	2016
Videau, Patrick; Wells, Kaitlyn N.; Singh, Arun J.; Gerwick, William H.; Philmus, Benjamin	Assessment of Anabaena sp Strain PCC 7120 as a Heterologous Expression Host for Cyanobacterial Natural Products: Production of Lyngbyatoxin A	ACS SYNTHETIC BIOLOGY	2016
Wan, Xia; Peng, Yun-Feng; Zhou, Xue-Rong; Gong, Yang-Min; Huang, Feng-Hong; Moncalian, Gabriel	Effect of cerulenin on fatty acid composition and gene expression pattern of DHA-producing strain Colwellia psychrerythraea strain 34H	MICROBIAL CELL FACTORIES	2016
Xu, Min; Wang, Yemin; Zhao, Zhilong; Gao, Guixi; Huang, Sheng-Xiong; Kang, Qianjin; He, Xinyi; Lin, Shuangjun; Pang, Xiuhua; Deng, Zixin; Tao, Meifeng	Functional Genome Mining for Metabolites Encoded by Large Gene Clusters through Heterologous Expression of a Whole-Genome Bacterial Artificial Chromosome Library in Streptomyces spp.	APPLIED AND ENVIRONMENTAL MICROBIOLOGY	2016
Yin, Shouliang	Heterologous expression of oxytetracycline biosynthetic gene cluster in Streptomyces venezuelae WVR2006 to improve production level and to alter fermentation process	Applied Microbiology and Biotechnology	2016
Zhai, Ying; Bai, Silei; Liu, Jingjing; Yang, Liyuan; Han, Li; Huang, Xueshi; He, Jing	Identification of an unusual type II thioesterase in the dithiolopyrrolone antibiotics biosynthetic pathway	BIOCHEMICAL AND BIOPHYSICAL RESEARCH COMMUNICATIONS	2016
Ahmadi, Mahmoud Kamal; Fawaz, Samar; Jones, Charles H.; Zhang, Guojian; Pfeifer, Blaine A.	Total Biosynthesis and Diverse Applications of the Nonribosomal Peptide-Polyketide Siderophore Yersiniabactin	APPLIED AND ENVIRONMENTAL MICROBIOLOGY	2015
Alqahtani, Norah; Porwal, Suheel K.; James, Elle D.; Bis, Dana M.; Karty, Jonathan A.; Lane, Amy L.; Viswanathan, Rajesh	Synergism between genome sequencing, tandem mass spectrometry and bio-inspired synthesis reveals insights into nocardioazine B biogenesis	ORGANIC {\&} BIOMOLECULAR CHEMISTRY	2015
Alt, Silke; Wilkinson, Barrie	Biosynthesis of the Novel Macrolide Antibiotic Anthracimycin	ACS CHEMICAL BIOLOGY	2015
Bian, Xiaoying; Plaza, Alberto; Yan, Fu; Zhang, Youming; Rolf, M.; Mueller, Rolf	Rational and efficient site-directed mutagenesis of adenylation domain alters relative yields of luminmide derivatives in vivo	BIOTECHNOLOGY AND BIOENGINEERING	2015
Bonet, Bailey; Teufel, Robin; Cruesemann, Max; Ziemert, Nadine; Moore, Bradley S.	Direct Capture and Heterologous Expression of Salinispora Natural Product Genes for the Biosynthesis of Enterocin	JOURNAL OF NATURAL PRODUCTS	2015
Castro, Jean Franco; Razmilic, Valeria; Gomez-Escribano, Juan Pablo; Andrews, Barbara; Asenjo, Juan A.; Bibb, Mervyn J.	Identification and Heterologous Expression of the Chaxamycin Biosynthesis Gene Cluster from Streptomyces leeuwenhoekii	APPLIED AND ENVIRONMENTAL MICROBIOLOGY	2015
Domr{\{o}}se	Andreas; Klein	Efficient recombinant production of prodigiosin in Pseudomonas putida	2015
Fayed, Bahgat; Ashford, David A.; Hashem, Amal M.; Amin, Magdy A.; El Gazayerly, Omaima N.; Gregory, Matthew A.; Smith, Margaret C. M.	Multiplexed Integrating Plasmids for Engineering of the Erythromycin Gene Cluster for Expression in Streptomyces spp. and Combinatorial Biosynthesis	APPLIED AND ENVIRONMENTAL MICROBIOLOGY	2015
Hashimoto, Takuya; Hashimoto, Junko; Teruya, Kuniko; Hirano, Takashi; Shin-ya, Kazuo; Ikeda, Haruo; Liu, Hung-wen; Nishiyama, Makoto; Kuzuyama, Tomohisa	Biosynthesis of Versipelostatin: Identification of an Enzyme-Catalyzed \[\4+2]-Cycloaddition Required for Macrocyclization of Spirotetronate-Containing Polyketides	JOURNAL OF THE AMERICAN CHEMICAL SOCIETY	2015
Huang, Sheng; Tabudravu, Jioji; Elsayed, Somayah S.; Travert, Jeanne; Peace, Doe; Tong, Ming Him; Kyeremeh, Kwaku; Kelly, Sharon M.; Trembleau, Laurent; Ebel, Rainer; Jaspars, Marcel; Yu, Yi; Deng, Hai	Discovery of a Single Monooxygenase that Catalyzes Carbamate Formation and Ring Contraction in the Biosynthesis of the Legonmycins.	Angewandte Chemie (International ed. in English)	2015
Kim, Se-Yu; Park, Soo-Young; Choi, Soo-Keun; Park, Seung-Hwan	Biosynthesis of Polymyxins B, E, and P Using Genetically Engineered Polymyxin Synthetases in the Surrogate Host Bacillus subtilis	JOURNAL OF MICROBIOLOGY AND BIOTECHNOLOGY	2015
Li, Jian; Jaitzig, Jennifer; Lu, Ping; Suessmuth, Roderich D.; Neubauer, Peter	Scale-up bioprocess development for production of the antibiotic valinomycin in Escherichia coli based on consistent fed-batch cultivations	MICROBIAL CELL FACTORIES	2015
Li, Jian; Jaitzig, Jennifer; Theuer, Lorenz; Legala, Ongey Elvis; Suessmuth, Roderich D.; Neubauer, Peter	Type II thioesterase improves heterologous biosynthesis of valinomycin in Escherichia coli	JOURNAL OF BIOTECHNOLOGY	2015
Li, Qinglian; Song, Yongxiang; Qin, Xiangjing; Zhang, Xing; Sun, Aijun; Ju, Jianhua	Identification of the Biosynthetic Gene Cluster for the Anti-infective Desotamides and Production of a New Analogue in a Heterologous Host	JOURNAL OF NATURAL PRODUCTS	2015
Li, Yongxin; Li, Zhongrui; Yamanaka, Kazuya; Xu, Ying; Zhang, Weipeng; Vlamakis, Hera	Directed natural product biosynthesis gene cluster capture and expression in the model bacterium Bacillus subtilis	Scientific Reports	2015
Liu, Chao; Zhang, Juanli; Lu, Chunhua; Shen, Yuemao	Heterologous expression of galbonolide biosynthetic genes in Streptomyces coelicolor	ANTONIE VAN LEEUWENHOEK INTERNATIONAL JOURNAL OF GENERAL AND MOLECULAR MICROBIOLOGY	2015
Liu, Joyce; Zhu, Xuejun; Seipke, Ryan F.; Zhang, Wenjun	Biosynthesis of Antimycins with a Reconstituted 3-Formamidosalicylate Pharmacophore in Escherichia coli	ACS SYNTHETIC BIOLOGY	2015
Lu, Jin; He, Qiang; Huang, Luyao; Cai, Xiaofeng; Guo, Wenwen; He, Jing; Zhang, Lili; Li, Aiying	Accumulation of a Bioactive Benzoisochromanequinone Compound Kalafungin by a Wild Type Antitumor-Medermycin-Producing Streptomycete Strain	PLOS ONE	2015
Nah, Hee-Ju; Woo, Min-Woo; Choi, Si-Sun; Kim, Eung-Soo	Precise cloning and tandem integration of large polyketide biosynthetic gene cluster using Streptomyces artificial chromosome system	MICROBIAL CELL FACTORIES	2015
Onaka, Hiroyasu; Ozaki, Taro; Mori, Yukiko; Izawa, Masumi; Hayashi, Shohei; Asamizu, Shumpei	Mycolic acid-containing bacteria activate heterologous secondary metabolite expression in Streptomyces lividans	JOURNAL OF ANTIBIOTICS	2015
Owen, Jeremy G.; Charlop-Powers, Zachary; Smith, Alexandra G.; Ternei, Melinda A.; Calle, Paula Y.; Reddy, Boojala Vijay B.; Montiel, Daniel; Brady, Sean F.	Multiplexed metagenome mining using short DNA sequence tags facilitates targeted discovery of epoxyketone proteasome inhibitors	PROCEEDINGS OF THE NATIONAL ACADEMY OF SCIENCES OF THE UNITED STATES OF AMERICA	2015
Rui, Zhe; Huang, Wei; Xu, Fei; Han, Mo; Liu, Xinyu; Lin, Shuangjun; Zhaneti, Wenjun	Sparsomycin Biosynthesis Highlights Unusual Module Architecture and Processing Mechanism in Non-ribosomal Peptide Synthetase	ACS CHEMICAL BIOLOGY	2015
Su, Chun; Zhao, Xinqing; Qiu, Rongguo; Tang, Li	Construction of the co-expression plasmids of fostriecin polyketide synthases and heterologous expression in Streptomyces	PHARMACEUTICAL BIOLOGY	2015
Sugimoto, Yuki; Ishida, Keishi; Traitcheva, Nelly; Busch, Benjamin; Dahse, Hans-Martin; Hertweck, Christian	Freedom and Constraint in Engineered Noncolinear Polyketide Assembly Lines	CHEMISTRY {\&} BIOLOGY	2015
Sun, Lei; Zeng, Jia; Zhang, Shuwei; Gladwin, Tyler; Zhan, Jixun	Effects of exogenous nutrients on polyketide biosynthesis in Escherichia coli	APPLIED MICROBIOLOGY AND BIOTECHNOLOGY	2015
Tang, Ying; Frewert, Simon; Harmrolfs, Kirsten; Herrmann, Jennifer; Karmann, Lisa; Kazmaier, Uli; Xia, Liqiu; Zhang, Youming; Muller, Rolf	Heterologous expression of an orphan NRPS gene cluster from Paenibacillus larvae in Escherichia coli revealed production of sevadicin.	Journal of biotechnology	2015
Thanapipatsiri, Anyarat; Claesen, Jan; Gomez-Escribano, Juan-Pablo; Bibb, Mervyn; Thamchaipenet, Arinthip	A Streptomyces coelicolor host for the heterologous expression of Type III polyketide synthase genes	MICROBIAL CELL FACTORIES	2015
Xu, Zhaoxian; Sun, Zhuzhen; Li, Sha; Xu, Zheng; Cao, Changhong; Xu, Zongqi; Feng, Xiaohai; Xu, Hong	Systematic unravelling of the biosynthesis of poly (L-diaminopropionic acid) in Streptomyces albulus PD-1	SCIENTIFIC REPORTS	2015
Xuejun Zhu, Joyce Liu & Wenjun Zhang	De novo biosynthesis of terminal alkyne-labeled natural products	Nature Chemical Biology	2015
Yang, Chunfang	Heterologous Expression of Fluostatin Gene Cluster Leads to a Bioactive Heterodimer	Organic Letters	2015
Yang, Jingya; Xiong, Zhi-Qiang; Song, Shu-Jie; Wang, Jian-Feng; Lv, Hua-Jun; Wang, Yong	Improving heterologous polyketide production in Escherichia coli by transporter engineering	APPLIED MICROBIOLOGY AND BIOTECHNOLOGY	2015
Zhang, Guojian; Li, Yi; Fang, Lei; Pfeifer, Blaine A.	Tailoring pathway modularity in the biosynthesis of erythromycin analogs heterologously engineered in E. coli	SCIENCE ADVANCES	2015
Zhou, Yongjun; Murphy, Annabel C.; Samborskyy, Markiyan; Prediger, Patricia; Dias, Luiz Carlos; Leadlay, Peter F.	Iterative Mechanism of Macrodiolide Formation in the Anticancer Compound Conglobatin	CHEMISTRY {\&} BIOLOGY	2015
Zhu, Li Ping; Yue, Xin Jing; Han, Kui; Li, Zhi Feng; Zheng, Lian Shuai; Yi, Xiu Nan; Wang, Hai Long; Zhang, You Ming	Allopatric integrations selectively change host transcriptomes , leading to varied expression efficiencies of exotic genes in Myxococcus xanthus	Microbial Cell Factories	2015
Zobel, Sophia; Kumpfmuller, Jana; Sussmuth, Roderich D.; Schweder, Thomas; Kumpfm{\{u}}ller	Bacillus subtilis as heterologous host for the secretory production of the non-ribosomal cyclodepsipeptide enniatin	Applied Microbiology and Biotechnology	2015
Aizawa, Teruki; Kim, Seung-Young; Takahashi, Shunji; Koshita, Masahiko; Tani, Mioka; Futamura, Yushi; Osada, Hiroyuki; Funa, Nobutaka	Alkyldihydropyrones, new polyketides synthesized by a type III polyketide synthase from Streptomyces reveromyceticus	JOURNAL OF ANTIBIOTICS	2014
Antosch, Janine; Schaefers, Francoise; Gulder, Tobias A. M.	Heterologous Reconstitution of Ikarugamycin Biosynthesis in E. coli	ANGEWANDTE CHEMIE-INTERNATIONAL EDITION	2014
Arakawa, Kenji	Genetic and biochemical analysis of the antibiotic biosynthetic gene clusters on the Streptomyces linear plasmid.	Bioscience, biotechnology, and biochemistry	2014
Carrion, Victor J.; van der Voort, Menno; Arrebola, Eva; Gutierrez-Barranquero, Jose A.; de Vicente, Antonio; Raaijmakers, Jos M.; Cazorla, Francisco M.	Mangotoxin production of Pseudomonas syringae pv. syringae is regulated by MgoA.	BMC microbiology	2014
Gemperlein, Katja; Rachid, Shwan; Garcia, Ronald O.; Wenzel, Silke C.; Mueller, Rolf	Polyunsaturated fatty acid biosynthesis in myxobacteria: different PUFA synthases and their product diversity	CHEMICAL SCIENCE	2014
Guo, Xun; Crawford, Jason M.	An Atypical Orphan Carbohydrate-NRPS Genomic Island Encodes a Novel Lytic Transglycosylase	CHEMISTRY {\&} BIOLOGY	2014
Hiratsuka, Tomoshige; Suzuki, Hideaki; Kariya, Ryo; Seo, Takashi; Minami, Atsushi; Oikawa, Hideaki	Biosynthesis of the Structurally Unique Polycyclopropanated Polyketide-Nucleoside Hybrid Jawsamycin ( FR-900848)\*\\*\	ANGEWANDTE CHEMIE-INTERNATIONAL EDITION	2014
Jaitzig, Jennifer; Li, Jian; Suessmuth, Roderich D.; Neubauer, Peter	Reconstituted Biosynthesis of the Nonribosomal Macrolactone Antibiotic Valinomycin in Escherichia coli	ACS SYNTHETIC BIOLOGY	2014
Jung, Won Seok; Kim, Eunji; Yoo, Young Ji; Ban, Yeon Hee; Kim, Eun Ji; Yoon, Yeo Joon	Characterization and engineering of the ethylmalonyl-CoA pathway towards the improved heterologous production of polyketides in Streptomyces venezuelae	APPLIED MICROBIOLOGY AND BIOTECHNOLOGY	2014
Kang, Hahk-Soo; Brady, Sean F.	Arixanthomycins A-C: Phylogeny-Guided Discovery of Biologically Active eDNA-Derived Pentangular Polyphenols	ACS CHEMICAL BIOLOGY	2014
Kang, Hahk-Soo; Brady, Sean F.	Mining Soil Metagenomes to Better Understand the Evolution of Natural Product Structural Diversity: Pentangular Polyphenols as a Case Study	JOURNAL OF THE AMERICAN CHEMICAL SOCIETY	2014
Oßwald, Corina	Modular construction of a functional artificial epothilone polyketide pathway	ACS Synthetic Biology	2014
Osswald, Corina; Zaburannyi, Nestor; Burgard, Christian; Hoffmann, Thomas; Wenzel, Silke C.; Mueller, Rolf	A highly unusual polyketide synthase directs dawenol polyene biosynthesis in Stigmatella aurantiaca	JOURNAL OF BIOTECHNOLOGY	2014
Osswald, Corina; Zipf, Gregor; Schmidt, Gisela; Maier, Josef; Bernauer, Hubert S.; Mueller, Rolf; Wenzel, Silke C.	Modular Construction of a Functional Artificial Epothilone Polyketide Pathway	ACS SYNTHETIC BIOLOGY	2014
Thies, Stephan; Santiago-Schubel, Beatrix; Kovacic, Filip; Rosenau, Frank; Hausmann, Rudolf; Jaeger, Karl-Erich	Heterologous production of the lipopeptide biosurfactant serrawettin W1 in Escherichia coli.	Journal of biotechnology	2014
Yamanaka, Kazuya; Reynolds, Kirk A.; Kersten, Roland D.; Ryan, Katherine S.; Gonzalez, David J.; Nizet, Victor; Dorrestein, Pieter C.; Moore, Bradley S.	Direct cloning and refactoring of a silent lipopeptide biosynthetic gene cluster yields the antibiotic taromycin A	PROCEEDINGS OF THE NATIONAL ACADEMY OF SCIENCES OF THE UNITED STATES OF AMERICA	2014
Dudnik, Alexey; Bigler, Laurent; Dudler, Robert	Heterologous expression of a Photorhabdus luminescens syrbactin-like gene cluster results in production of the potent proteasome inhibitor glidobactin A	MICROBIOLOGICAL RESEARCH	2013
Fitzgerald, Jay T.; Charkoudian, Louise K.; Watts, Katharine R.; Khosla, Chaitan	Analysis and Refactoring of the A-74528 Biosynthetic Pathway	JOURNAL OF THE AMERICAN CHEMICAL SOCIETY	2013
Jiang, Ming; Pfeifer, Blaine A.	Metabolic and pathway engineering to influence native and altered erythromycin production through E. coli	METABOLIC ENGINEERING	2013
Jiang, Ming; Zhang, Haoran; Park, Sung-Hee; Li, Yi; Pfeifer, Blaine A.	Deoxysugar pathway interchange for erythromycin analogues heterologously produced through Escherichia coli	METABOLIC ENGINEERING	2013
Kitagawa, Wataru; Ozaki, Taro; Nishioka, Taiki; Yasutake, Yoshiaki; Hata, Miyako; Nishiyama, Makoto; Kuzuyama, Tomohisa; Tamura, Tomohiro	Cloning and Heterologous Expression of the Aurachin RE Biosynthesis Gene Cluster Afford a New Cytochrome P450 for Quinoline N-Hydroxylation	CHEMBIOCHEM	2013
Komatsu, Mamoru; Komatsu, Kyoko; Koiwai, Hanae; Yamada, Yuuki; Kozone, Ikuko; Izumikawa, Miho; Hashimoto, Junko; Takagi, Motoki; Omura, Satoshi; Shin-ya, Kazuo; Cane, David E.; Ikeda, Haruo	Engineered Streptomyces avermitilis Host for Heterologous Expression of Biosynthetic Gene Cluster for Secondary Metabolites	ACS SYNTHETIC BIOLOGY	2013
Mantovani, Simone M.; Moore, Bradley S.	Flavin-Linked Oxidase Catalyzes Pyrrolizine Formation of Dichloropyrrole-Containing Polyketide Extender Unit in Chlorizidine A	JOURNAL OF THE AMERICAN CHEMICAL SOCIETY	2013
Ongley, Sarah E.; Bian, Xiaoying; Zhang, Youming; Chau, Rocky; Gerwick, William H.; Mueller, Rolf; Neilan, Brett A.	High-Titer Heterologous Production in E. coli of Lyngbyatoxin, a Protein Kinase C Activator from an Uncultured Marine Cyanobacterium	ACS CHEMICAL BIOLOGY	2013
Stevens, David Cole; Conway, Kyle R.; Pearce, Nelson; Villegas-Penaranda, Luis Roberto; Garza, Anthony G.; Boddy, Christopher N.	Alternative Sigma Factor Over-Expression Enables Heterologous Expression of a Type II Polyketide Biosynthetic Pathway in Escherichia coli	PLOS ONE	2013
Wyatt, Morgan A.; Magarvey, Nathan A.	Optimizing dimodular nonribosomal peptide synthetases and natural dipeptides in an Escherichia coli heterologous host	BIOCHEMISTRY AND CELL BIOLOGY-BIOCHIMIE ET BIOLOGIE CELLULAIRE	2013
Yu, Dayu; Xu, Fuchao; Valiente, Jonathan; Wang, Siyuan; Zhan, Jixun	An indigoidine biosynthetic gene cluster from Streptomyces chromofuscus ATCC 49982 contains an unusual IndB homologue	JOURNAL OF INDUSTRIAL MICROBIOLOGY {\&} BIOTECHNOLOGY	2013
